# Supplementary material for: Severity of thermal burn injury is associated with systemic neutrophil activation
Source: bioRxiv or medRxiv preprint supplement (doi:10.1101/2021.10.07.21264679), 2021-10-07
Supplement: Supplementary file [file media-1.pdf]

## **Supplemental Information**

### **Severity of thermal burn injury is associated with systemic neutrophil activation**

Maria Laggner, Marie-Therese Lingitz, Dragan Copic, Martin Direder, Katharina Klas, Daniel Bormann, Alfred Gugerell, Bernhard Moser, Christine Radtke, Stefan Hacker, Michael Mildner, Hendrik Jan Ankersmit, Thomas Haider

Supplemental Figure S1

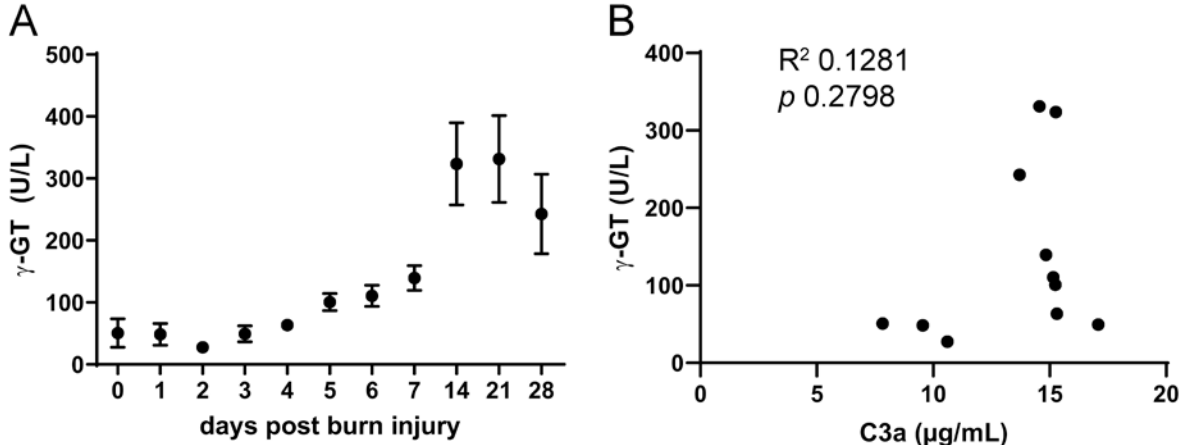

Supplemental Figure S1.  $\gamma$ -GT levels following burn injury. (A) Serum  $\gamma$ -GT levels in burn victims up to 4 weeks post injury. (B) Correlation between serum C3a and  $\gamma$ -GT concentrations over 28 days post burn trauma.

Supplemental Figure S2

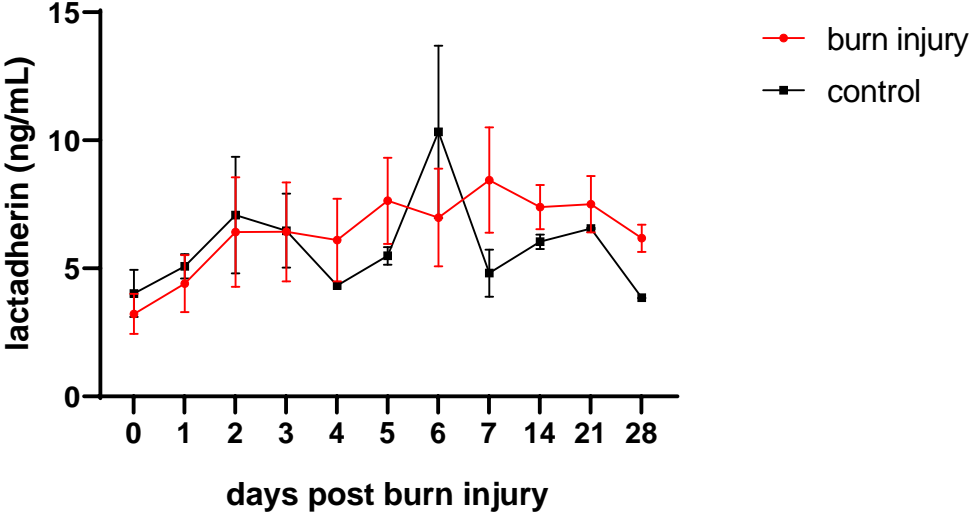

Supplemental Figure S2. Lactadherin levels following burn injury. Lactadherin concentrations in sera of burn victims and healthy controls over 4 weeks.

Supplemental Figure S3

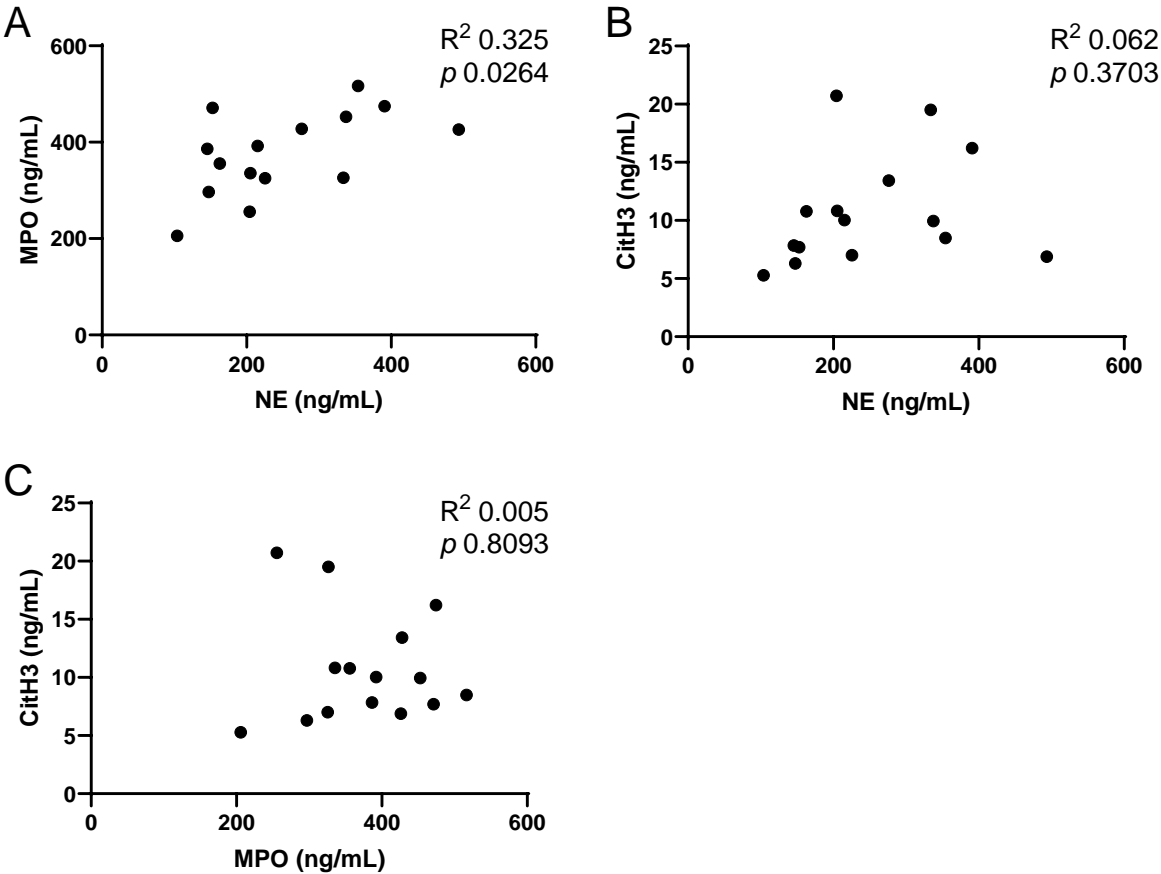

Supplemental Figure S3. Correlations between serum levels of NETosis markers in burn victims. Correlation between (A) MPO and NE, (B) CitH3 and NE, and (C) CitH3 and MPO on admission day.

**Supplemental Figure S4**

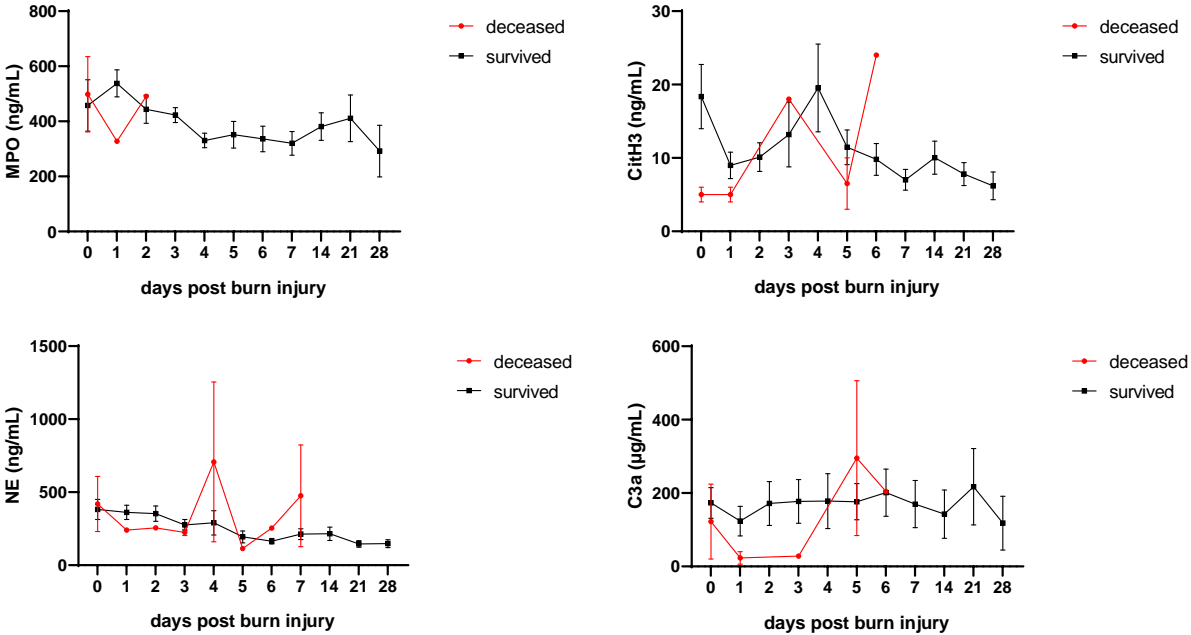

**Supplemental Figure S4. NETosis levels in patients succumbing to burn injury.** Serum concentrations of neutrophil-derived factors were compared between survivors and deceased patients.

## Supplemental Figure S5

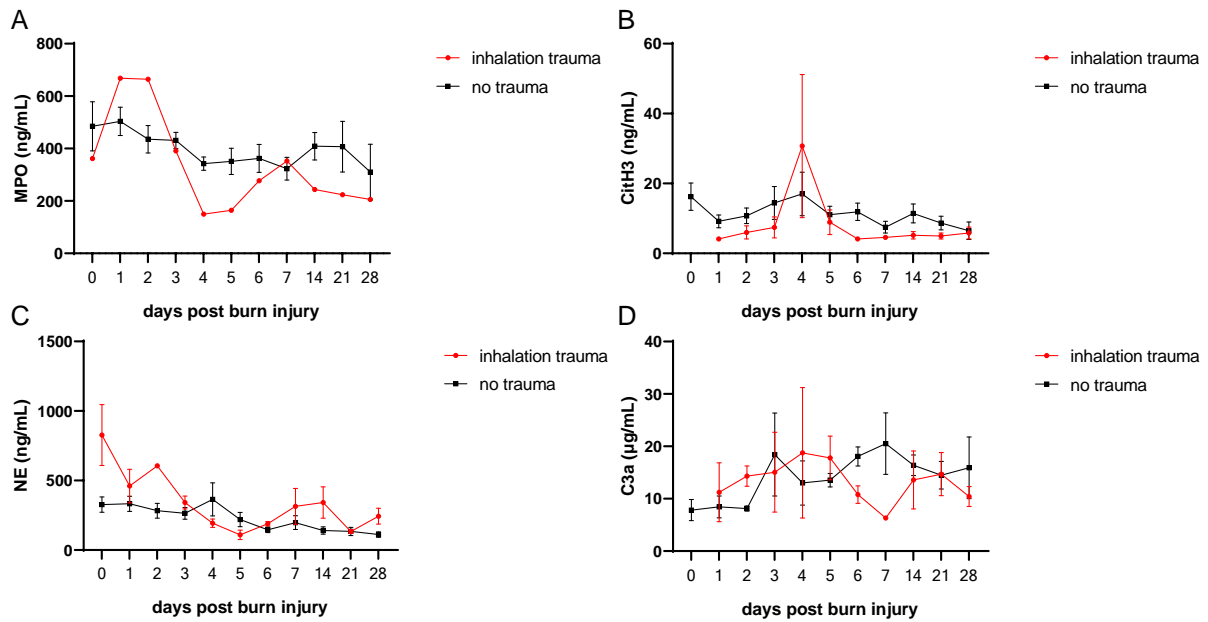

**Supplemental Figure S5. Effect of inhalation trauma on serum NETosis levels.** Serum levels of neutrophil-derived factors were compared between burn victims with inhalation trauma and without inhalation trauma. Serum levels of (A) MPO, (B) CitH3, (C) NE, and (D) C3a were assessed up to 4 weeks post burn injury.

## Supplemental Figure S6

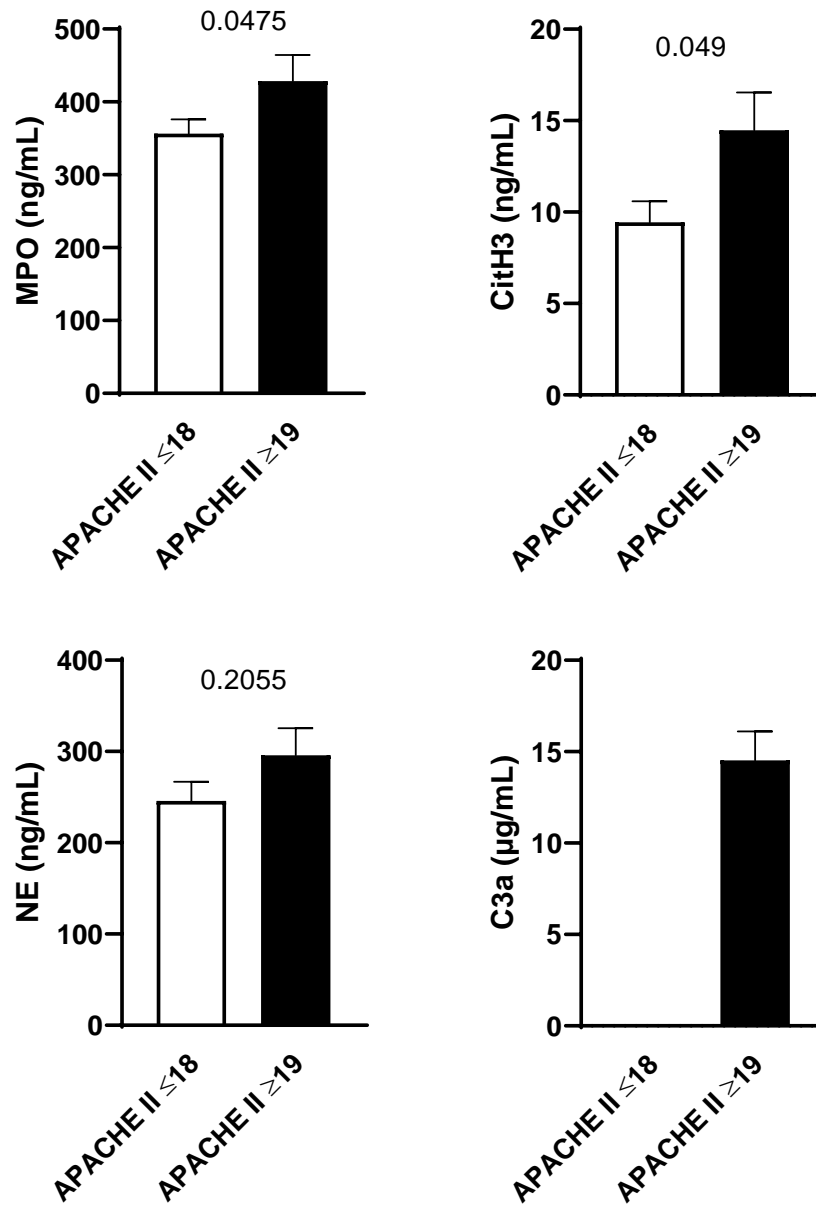

**Supplemental Figure S6. Serum concentrations of neutrophil-derived factors in low and high APACHE II scores.** Scores were determined on admission day and categorized into low ( $\leq 18$ ) and high ( $\geq 19$ ) values. Serum concentrations of MPO, CitH3, NE, and C3a of the first 7 days post admission were compared. Data were compared by Mann-Whitney test.

### Supplemental Figure S7

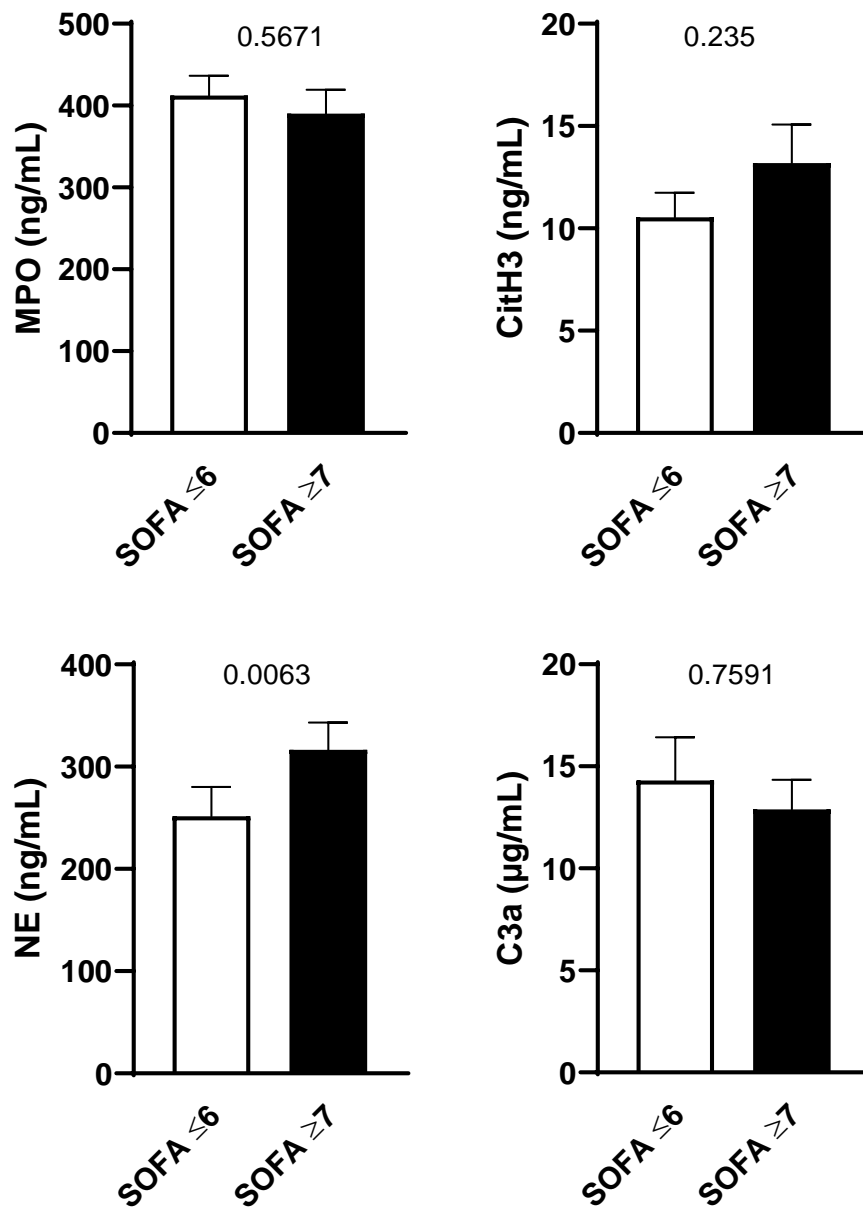

**Supplemental Figure S7. Serum concentrations of neutrophil-derived factors in low and high SOFA scores.** Scores were determined on admission day and categorized into low ( $\leq 6$ ) and high ( $\geq 7$ ) values. Serum concentrations of MPO, CitH3, NE, and C3a of the first 7 days post admission were compared. Data were compared by Mann-Whitney test.



## Supplemental Figure S8

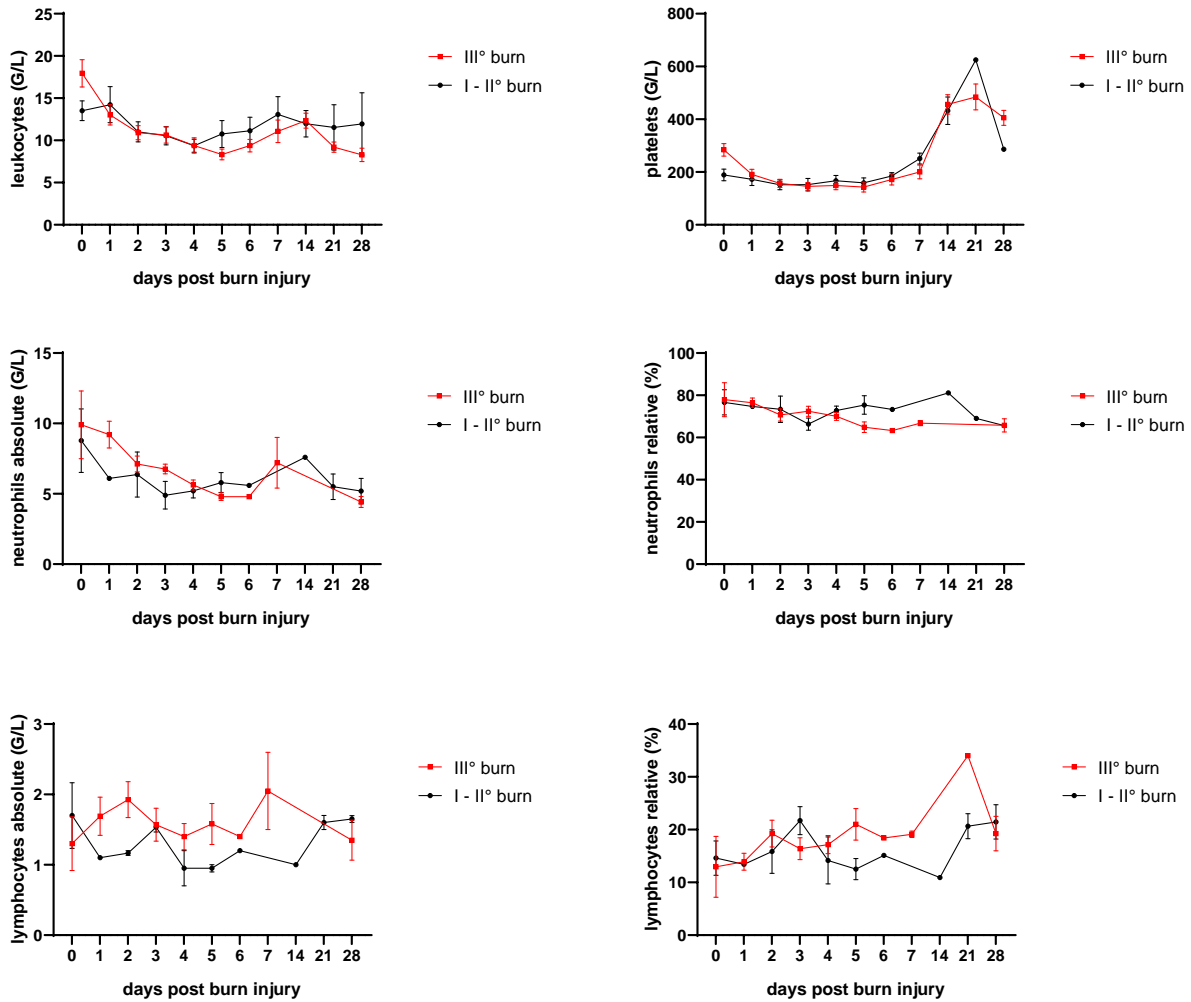

**Supplemental Figure S8. Immune cell counts of patients with higher and lower degree burns.** Data of 3<sup>rd</sup> degree burns and lower degree burns were compared by Mann-Whitney test.

## Supplemental Figure S9

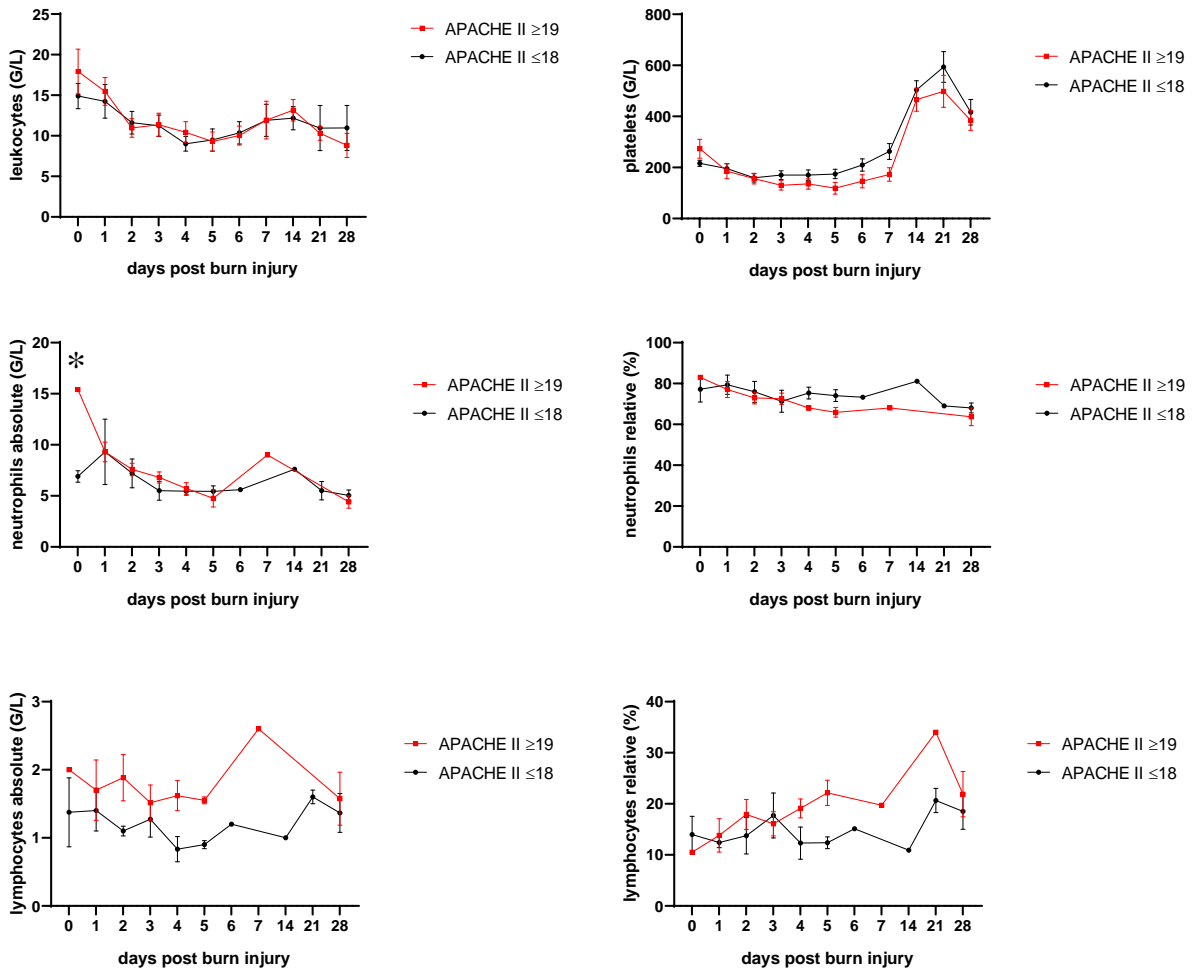

**Supplemental Figure S9. Immune cell counts of patients with high and low APACHE II scores.** Scores were determined on admission day and categorized into low ( $\leq 18$ ) and high ( $\geq 19$ ) values. Data were compared by Mann-Whitney test.

## Supplemental Figure S10

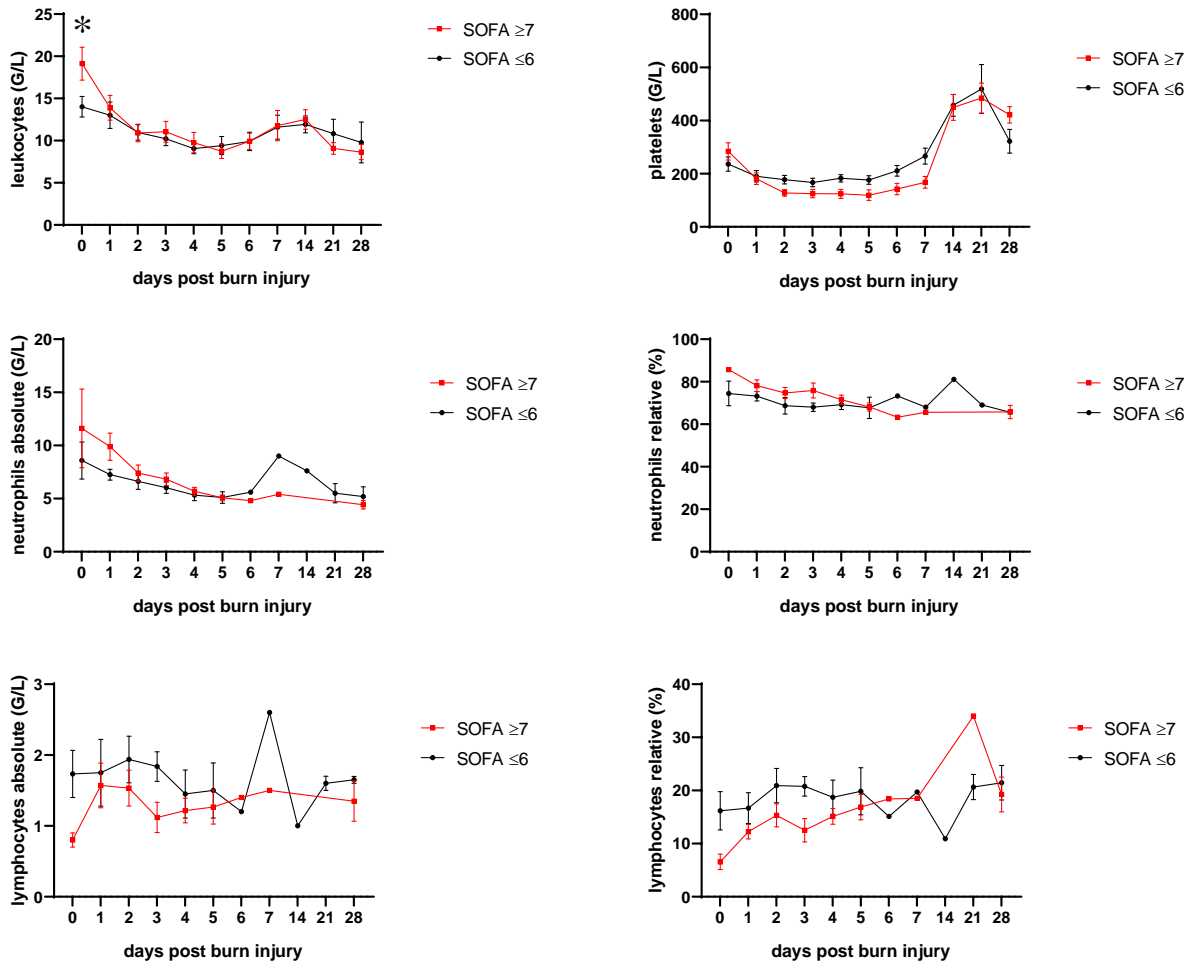

**Supplemental Figure S10. Immune cell counts of patients with high and low SOFA scores.** Scores were determined on admission day and categorized into low ( $\leq 6$ ) and high ( $\geq 7$ ) values. Data were compared by Mann-Whitney test.

## Supplemental Figure S11

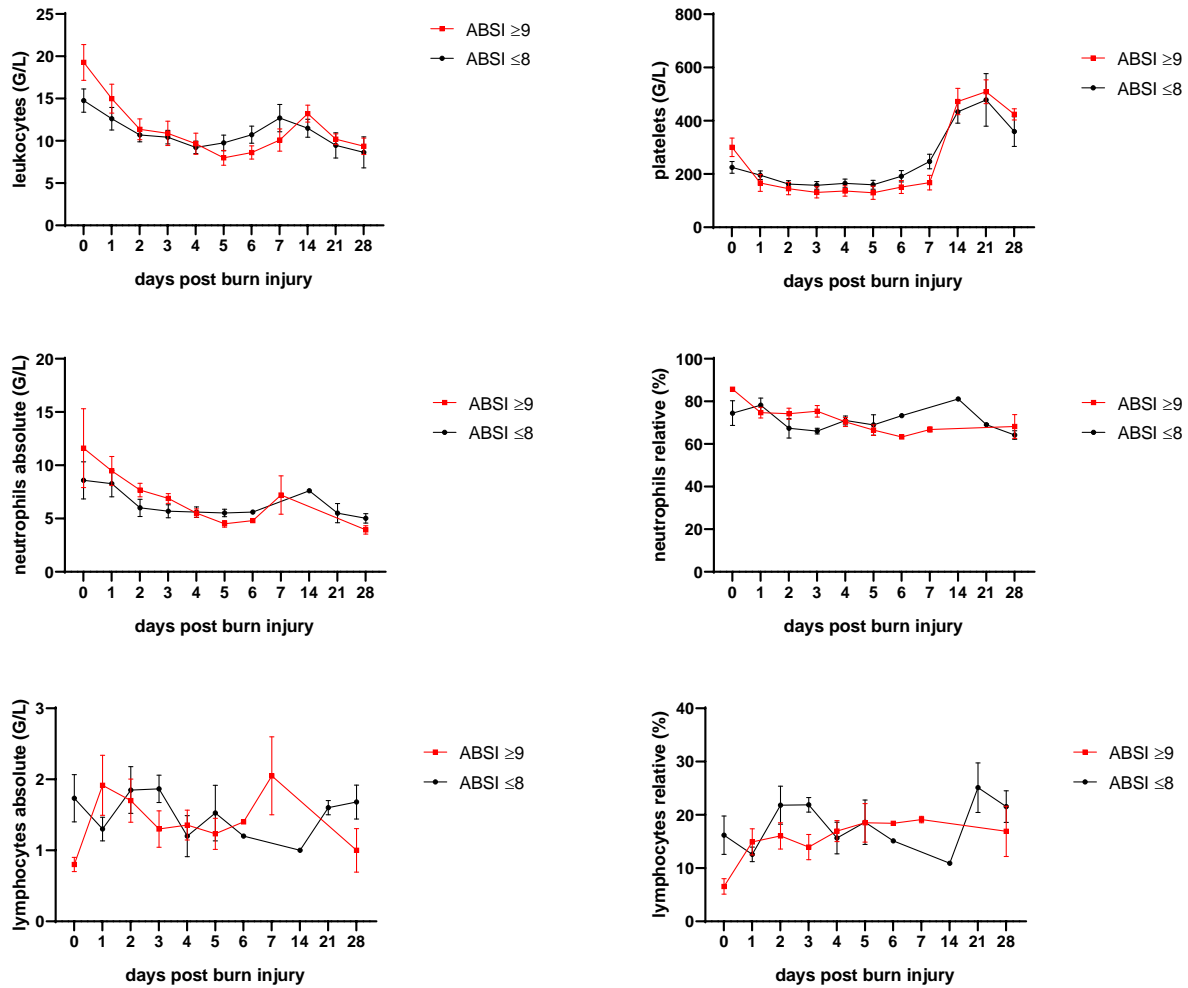

**Supplemental Figure S11. Immune cell counts of patients with high and low ABSI scores.** Scores were determined on admission day and categorized into low ( $\leq 8$ ) and high ( $\geq 9$ ) values. Data were compared by Mann-Whitney test.
